# Supplementary material for: Direct synthesis of bifunctional mesoporous organosilicas containing chelating groups in the framework and reactive functional groups in the channel pores
Source: Royal Society of Chemistry journal article supplement (doi:10.1039/b613804g), 2006-11-24

## Supplementary Information 1

TEM image for the sample  $X^F_{1-3}$  showing the organized domains. Scale bar = 100 nm

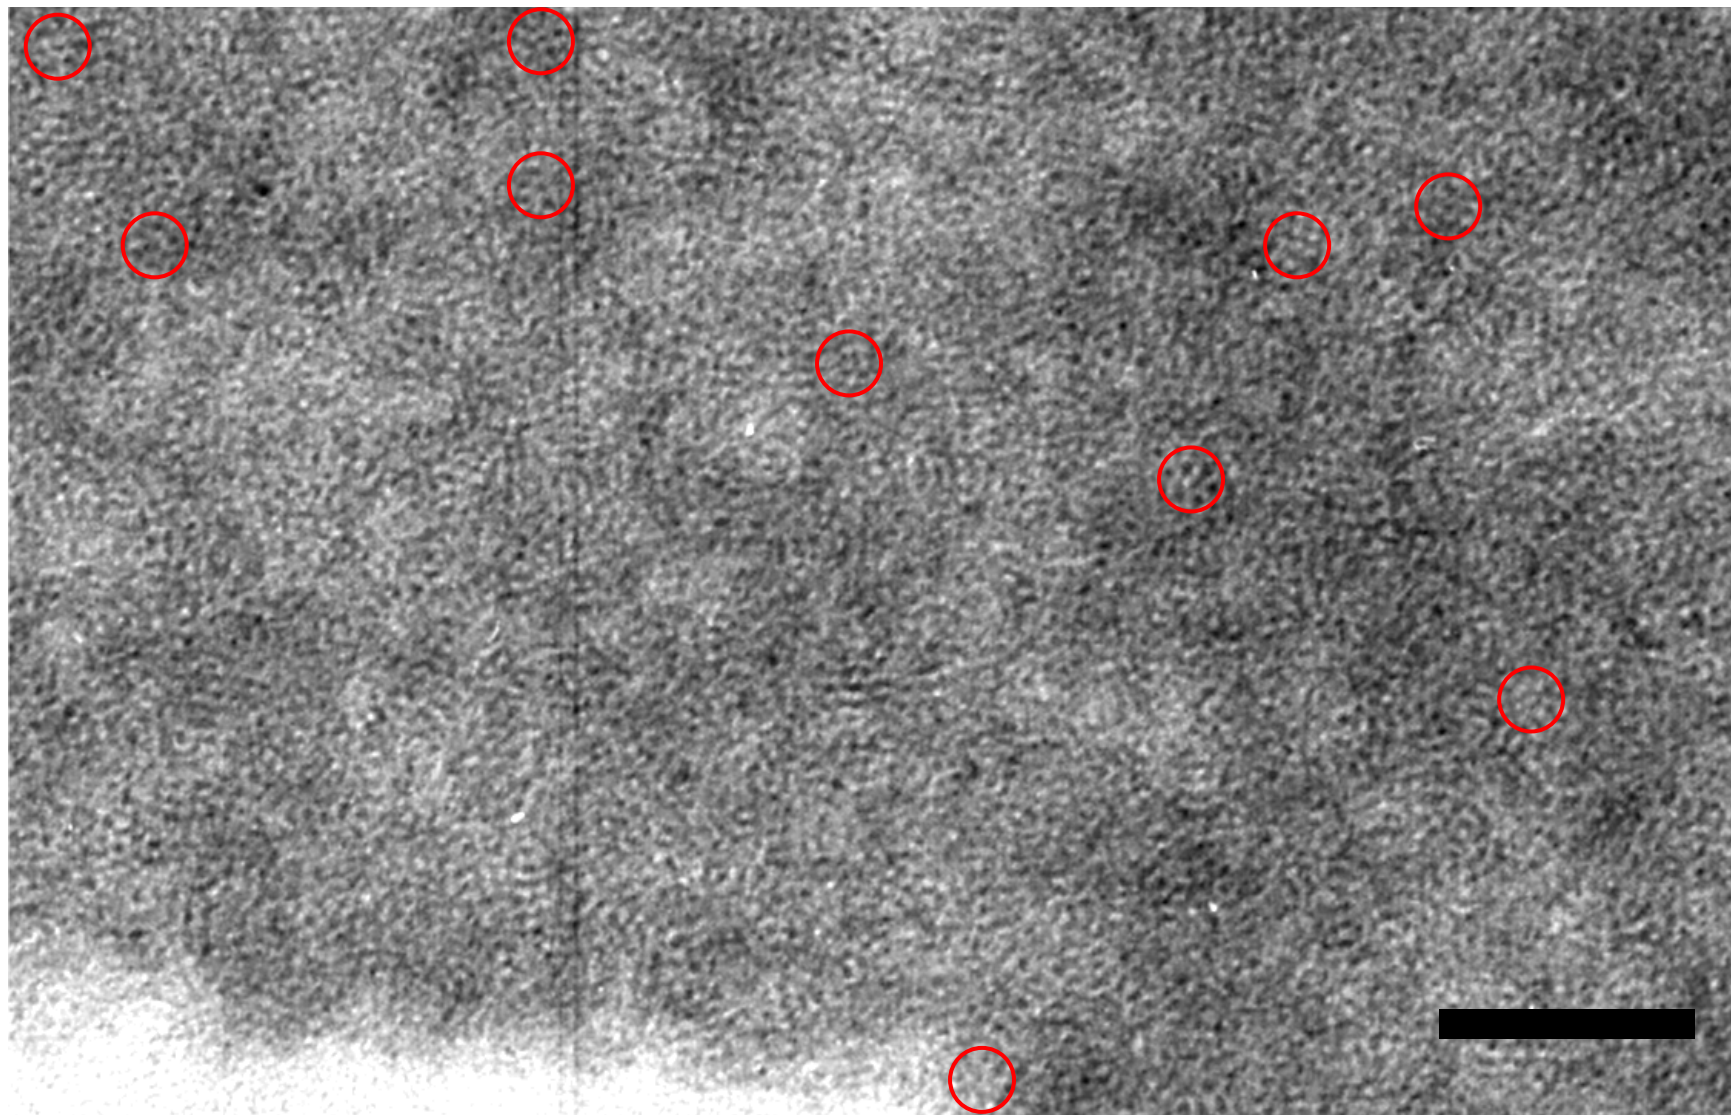

Supplement: b613804g1.pdf [file b613804g1.pdf]
