# Supplementary figures and images for: Direct synthesis of bifunctional mesoporous organosilicas containing chelating groups in the framework and reactive functional groups in the channel pores
Source: Royal Society of Chemistry journal article supplement (doi:10.1039/b613804g), 2006-11-24

## Supplementary Information 2

### $^{13}\text{C}$ NMR solid state of $\text{X}^{\text{F}}_{1-4}$ and $\text{X}^{\text{F}}_{1-5}$

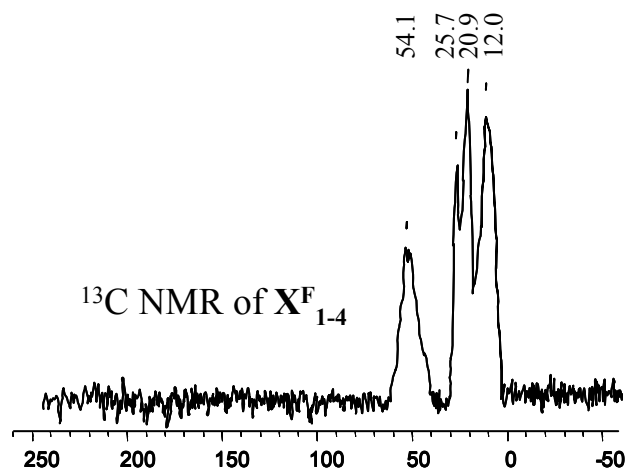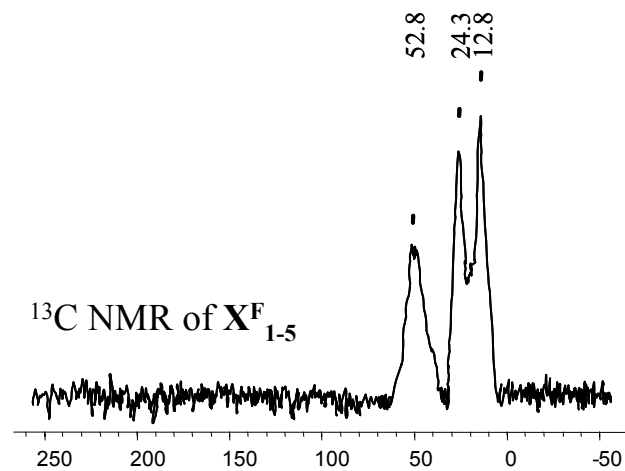

Supplement: b613804g2.pdf [file b613804g2.pdf]
